# Supplementary material for: Investigating the Role of Myeloperoxidase and Angiopoietin-like Protein 6 in Obesity and Diabetes
Source: PubMed Central journal article supplement (PMC7148302; doi:10.1038/s41598-020-63149-7), 2020-04-10
Supplement: 41598_2020_63149_MOESM1_ESM.pdf [file 41598_2020_63149_MOESM1_ESM.pdf]

# Investigating the Role of Myeloperoxidase and Angiotensin-like Protein 6 in Obesity and Diabetes

Mohammad G. Qaddoumi <sup>1,2</sup>, Muath Alanbaei <sup>3</sup>, Maha M. Hammad <sup>1</sup>, Irina Al-Khairi <sup>1</sup>, Preethi Cherian <sup>1</sup>, Arshad Channanath<sup>4</sup>, Thangavel Alphonse Thanaraj<sup>4</sup>, Fahd Al-Mulla <sup>4</sup>, Mohamed Abu-Farha <sup>1\*</sup>, and Jehad Abubaker <sup>1\*</sup>

- <sup>1</sup> Biochemistry and Molecular Biology, Dasman Diabetes Institute, Kuwait City, Kuwait.
- <sup>2</sup> Pharmacology and Therapeutics Department, Faculty of Pharmacy, Kuwait University, Kuwait City, Kuwait.
- <sup>3</sup> Department of Medicine, Faculty of Medicine, Kuwait University, Kuwait City, Kuwait.
- <sup>4</sup> Functional Genomic Unit, Dasman Diabetes Institute, 15462 Kuwait City, Kuwait;

\* Correspondence: [jehad.abubakr@dasmaninstitute.org](mailto:jehad.abubakr@dasmaninstitute.org); [mohamed.abufarha@dasmaninstitute.org](mailto:mohamed.abufarha@dasmaninstitute.org);  
Tel.: +965 2224-2999

## Supplementary Table S1: Association between circulating ANGPTL6 or MPO levels and the outcomes of diabetes and obesity using multivariate logistic regression

|                    | T2D<br>AOR [95%CI] | p-value | Obesity<br>AOR [95%CI] | p-value |
|--------------------|--------------------|---------|------------------------|---------|
| ANGPTL6<br>(ng/mL) | 1.04 [1.01-1.08]   | 0.005   | 1.03[1.01-1.06]        | 0.023   |
| MPO<br>(ng/mL)     | 0.99 [0.98-1.01]   | 0.694   | 1.01[0.99-1.02]        | 0.065   |

ANGPTL6: Angiotensin-like protein 6; AOR: Adjusted odds ratio (adjusted for age and gender);  
MPO: Myeloperoxidase
